# Supplementary material for: Acylated Ghrelin Supports the Ovarian Transcriptome and Follicles in the Mouse: Implications for Fertility
Source: PubMed Central journal article supplement (PMC6340924; doi:10.3389/fendo.2018.00815), 2019-01-15
Supplement: Table_1.pdf [file Table_1.pdf]

**sTable 1.** Top canonical pathways that were significantly affected by GOAT deletion as identified by Ingenuity® Pathway Analysis (IPA). The significance of the association between upregulated genes and the canonical pathway was evaluated using a right-tailed Fisher's exact test to calculate a p-value determining the probability that the association is explained by chance alone. Ratios referring to the proportion of upregulated genes from a pathway related to the total number of molecules that make up that particular pathway are also displayed.

| Treatment      | Ingenuity Canonical Pathways        | Genes                                                                            | -log(p-value) | Ratio |
|----------------|-------------------------------------|----------------------------------------------------------------------------------|---------------|-------|
| <b>GOAT KO</b> | Virus Entry via Endocytic Pathways  | CD55,RRAS2,PIK3C2A,PIK3R1,ITGA6,ITGB6,PRKD3,CXADR,PRKCZ,ACTA1,PRKCB              | 5.32          | 0.129 |
|                | NF-κB Activation by Viruses         | RELA,CCR5,RRAS2,PIK3C2A,PIK3R1,ITGA6,AKT3,PRKD3,PRKCZ,PRKCB                      | 5.11          | 0.132 |
|                | Role of Pattern Recognition Recepto | PTX3,TLR4,RELA,PIK3C2A,PIK3R1,MAPK8,C1QB,PRKD3,PRKCZ,PRKCB                       | 4.43          | 0.111 |
|                | LPS-stimulated MAPK Signaling       | TLR4,RELA,RRAS2,PIK3C2A,PIK3R1,MAPK8,PRKD3,PRKCZ,PRKCB                           | 4.28          | 0.117 |
|                | HER-2 Signaling in Breast Cancer    | RRAS2,PIK3C2A,PIK3R1,PARD6B,AKT3,ITGB6,PRKD3,PRKCZ,PRKCB                         | 4.28          | 0.118 |
|                | MSP-RON Signaling Pathway           | TLR4,CCL2,PIK3C2A,PIK3R1,MST1R,PRKCZ,ACTA1                                       | 4.23          | 0.163 |
|                | Endothelin-1 Signaling              | PIK3C2A,ITPR2,PIK3R1,PTGS1,MAPK8,PLA2G2A,PRKCZ,RRAS2,EDN1,CASQ1,PLD6,PRKD3,PRKCB | 4.05          | 0.080 |
